# Supplementary material for: Shock-tube study of the decomposition of tetramethylsilane using gas chromatography and high-repetition-rate time-of-flight mass spectrometry
Source: Royal Society of Chemistry journal article supplement (doi:10.1039/c7cp06827a), 2018-01-01
Supplement: c7cp06827a1.pdf [file c7cp06827a1.pdf]

## Supplemental material

### Shock-tube study of the decomposition of tetramethylsilane using gas chromatography and high-repetition-rate time-of-flight mass spectrometry

P. Sela, S. Peukert, J. Herzler, M. Fikri, C. Schulz

*IVG, Institute for Combustion and Gas Dynamics – Reactive Fluids and CENIDE, Center for Nanointegration Duisburg-Essen, University of Duisburg-Essen, 47057 Duisburg, Germany*

**Concentration profiles simulated with the hydrocarbon chemistry module from Healy *et al.*<sup>1</sup>.**

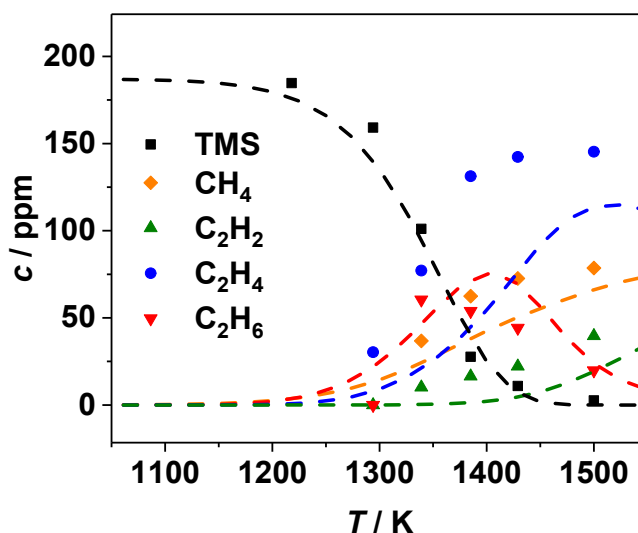

S1: Comparison of the measured and simulated (hydrocarbon chemistry module from Healy *et al.*<sup>1</sup>) concentration profiles as a function of the temperature for 200 ppm TMS, 400 ppm Kr in Ar. Measured: TMS, CH<sub>4</sub>, C<sub>2</sub>H<sub>2</sub>, C<sub>2</sub>H<sub>4</sub>, and C<sub>2</sub>H<sub>6</sub>; simulated: TMS, C<sub>2</sub>H<sub>2</sub>, C<sub>2</sub>H<sub>4</sub>, and C<sub>2</sub>H<sub>6</sub>.

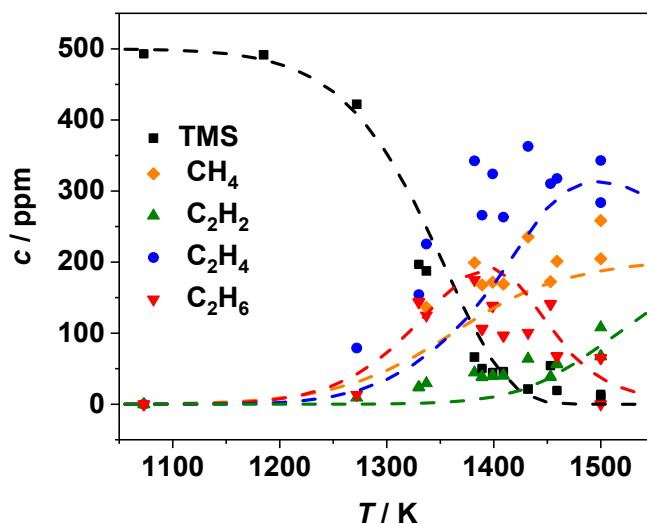

S2: Comparison of the measured and simulated (hydrocarbon chemistry module from Healy *et al.*<sup>1</sup>) concentration profiles as a function of the temperature. Measured: TMS, CH<sub>4</sub>, C<sub>2</sub>H<sub>2</sub>, C<sub>2</sub>H<sub>4</sub>, and C<sub>2</sub>H<sub>6</sub>; simulated: TMS, CH<sub>4</sub>, C<sub>2</sub>H<sub>2</sub>, C<sub>2</sub>H<sub>4</sub>, and C<sub>2</sub>H<sub>6</sub> for 500 ppm TMS, 500 ppm Kr in Ar.

**Local sensitivity analysis for CH<sub>4</sub>, C<sub>2</sub>H<sub>4</sub> and C<sub>2</sub>H<sub>6</sub> with the hydrocarbon chemistry module from Healy *et al.*<sup>1</sup> for 500 ppm TMS + 500 ppm Kr in Ar.**

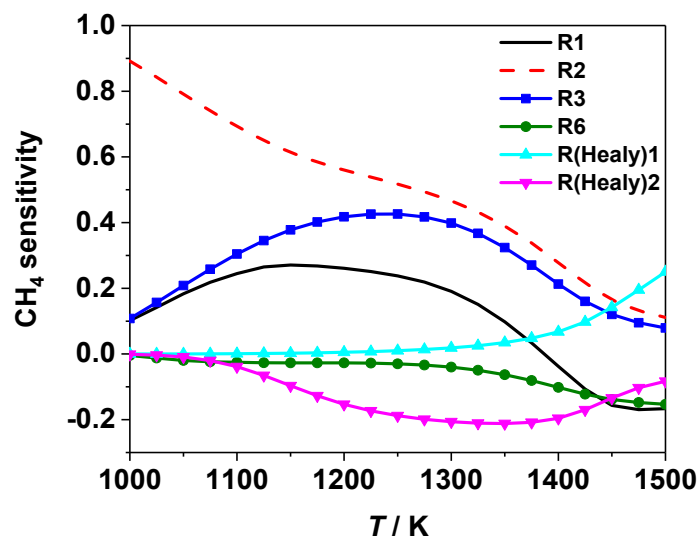

S3: Local sensitivity analysis for CH<sub>4</sub> for an initial concentration of 500 ppm TMS in Ar. The figure shows the reactions with the largest impact on CH<sub>4</sub> concentration. The reactions R1, R2, R5, and R6 are listed in Table 2 of the main document and R(Healy)1: CH<sub>3</sub> + H + M ↔ CH<sub>4</sub> + M and R(Healy)2: CH<sub>3</sub> + CH<sub>3</sub> + M ↔ C<sub>2</sub>H<sub>6</sub> + M are reactions from the Healy mechanism<sup>1</sup>.

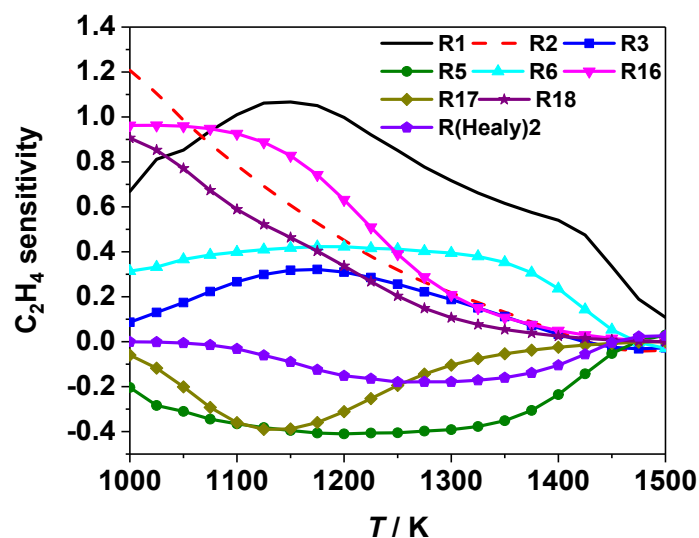

S4: Local sensitivity analysis for  $C_2H_4$  for an initial concentration of 500 ppm TMS in Ar. The figure shows the reactions with the largest impact on  $C_2H_4$  concentration. The reactions R1, R2, R5, R6, R12, R13 and R16 are listed in Table 2 of the main document and R(Healy)2:  $CH_3 + CH_3 + M \leftrightarrow C_2H_6 + M$  is a reaction from the Healy mechanism<sup>1</sup>.

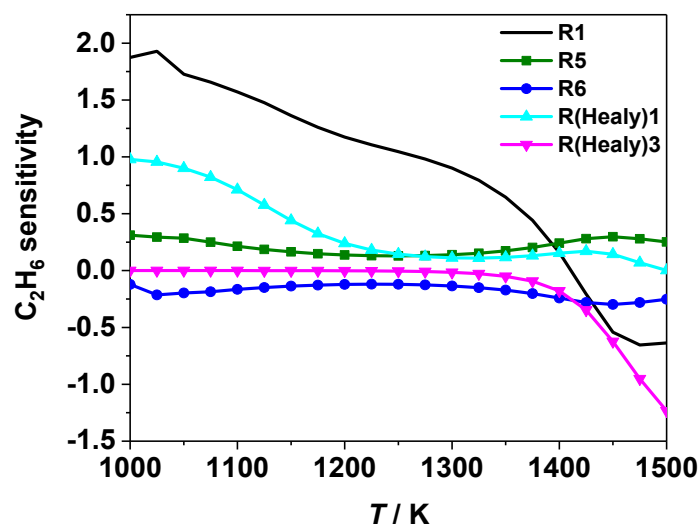

S5: Local sensitivity analysis for  $C_2H_6$  for an initial concentration of 500 ppm TMS in Ar. The figure shows the reactions with the largest impact on  $C_2H_6$  concentration. The reactions R1, R5 and R6 are listed in Table 2 of the main document and R(Healy)1:  $CH_3 + H + M \leftrightarrow CH_4 + M$  and R(Healy)3:  $C_2H_6 + H \rightarrow C_2H_5 + H_2$  are reactions from the Healy mechanism<sup>1</sup>.

**Transmission electron microscopy (TEM) and energy dispersive X-ray spectroscopy (EDX) measurements of the produced particles inside the shock tube.**

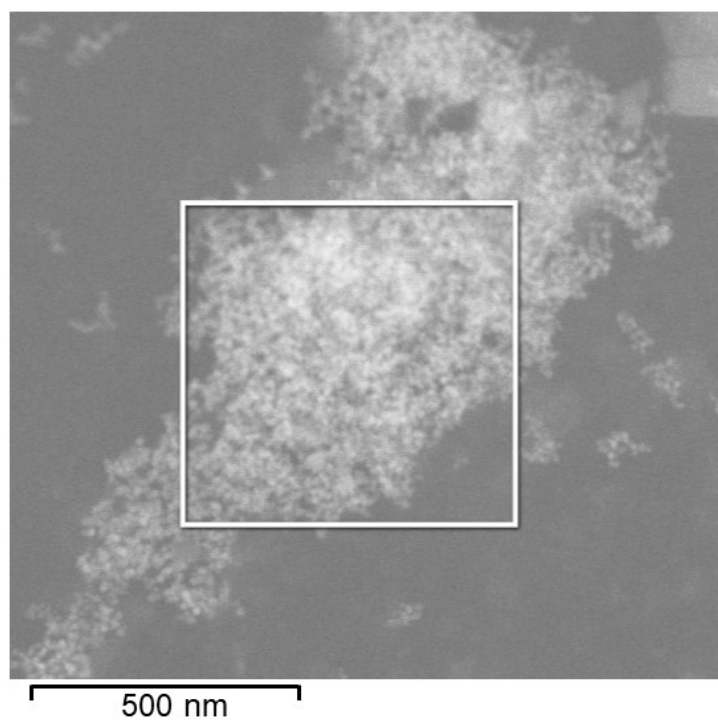

S6: Scanning electron microscopic (SEM) image of the produced brownish solid. The figure shows the region that was chosen for element distribution measurements (Figure S7) via energy-dispersive X-ray spectroscopy (EDX).

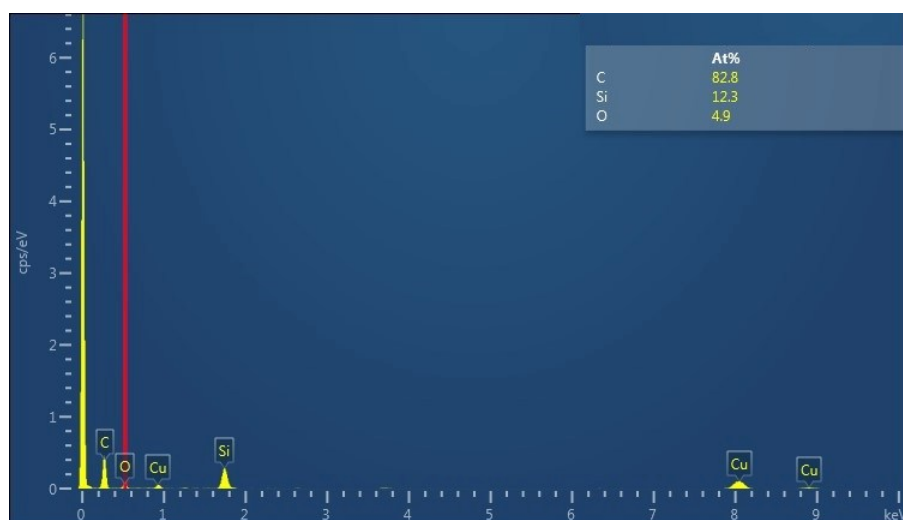

S7: Element distribution of the produced brownish solid with a composition of 83% carbon and 12% silicon.

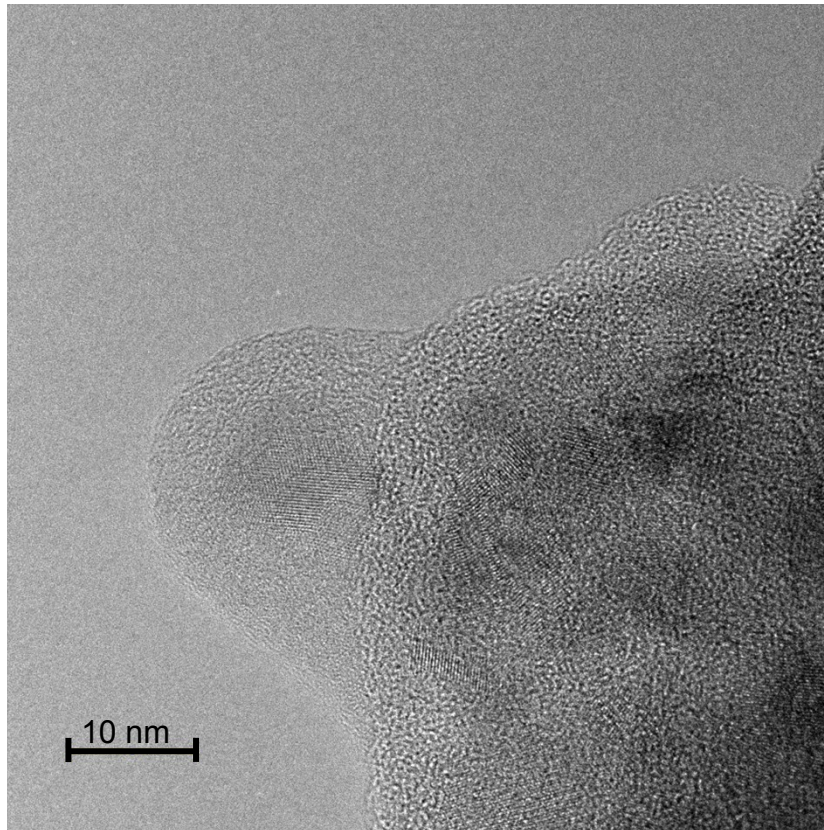

S8: TEM image showing the crystalline structure of the deposit close to the end wall (magnification: 300.000).

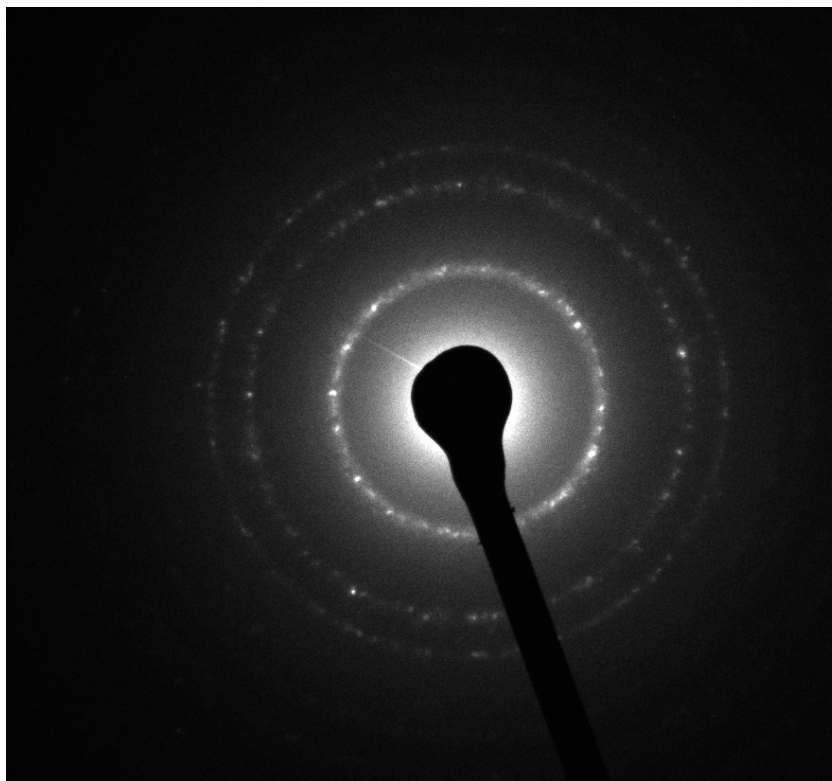

S9: Diffraction image taken with TEM in diffraction mode. The diffraction pattern corresponds to the crystal structure documented for  $\text{SiC}^2$ .

## Reference

1. D. Healy, N. S. Donato, C. J. Aul, E. L. Petersen, C. M. Zinner, G. Bourque and H. J. Curran, *Combustion and Flame*, 2010, **157**, 1526-1539.
2. Braekken, H., *Zeitschrift fuer Kristallographie, Kristallgeometrie, Kristallphysik, Kristallchemie* (-144,1977), 1930, **75**, 572-573
